# Supplementary material
Source: PubMed Central journal article supplement (PMC5240012)
Supplement: Supp_Fig1.pdf [file Supp_Fig1.pdf]

## Supplementary Data

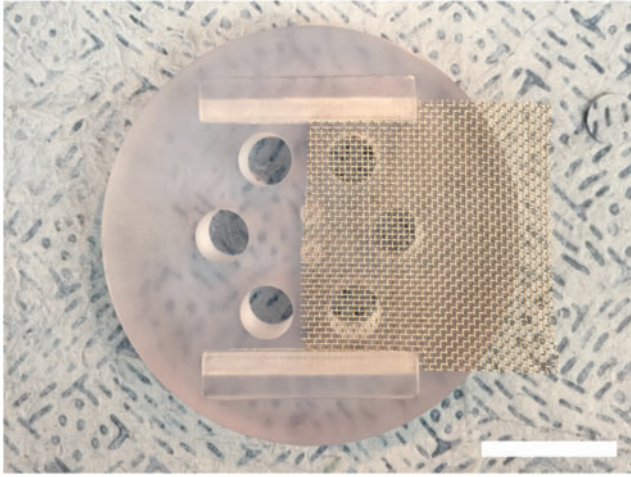

**SUPPLEMENTARY FIG. S1.** Scaffold holder and support mesh. Six scaffolds of 8 mm in diameter were distributed axi-symmetrically within a custom-made polycarbonate holder. A support mesh made of stainless steel 316 slides into place to prevent the movement of scaffolds during flow perfusion culture. Scale bar represents 2 cm.
