# Supplementary material
Source: PubMed Central journal article supplement (PMC5240012)
Supplement: Supp_Fig7.pdf [file Supp_Fig7.pdf]

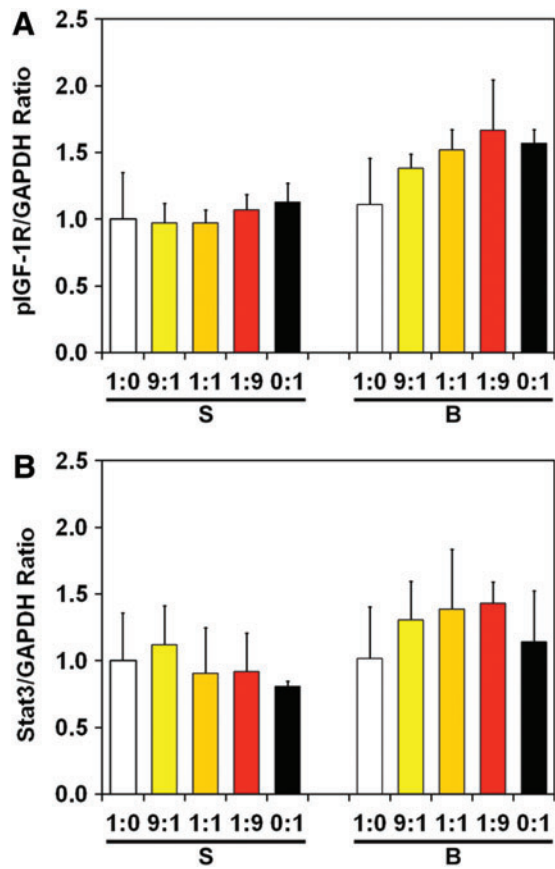

**SUPPLEMENTARY FIG. S7.** Expression of pIGF-1R (A) and Stat3 (B) for the five different ES:MSC ratios examined (1:0, 9:1, 1:1, 1:9, and 0:1) cultured in static or flow perfusion conditions (S and B, respectively). Both proteins were quantified via western blotting, and signal density was normalized to GAPDH content. The error bars represent the standard deviation for  $n=3$  samples in both panels.
