# Supplementary material
Source: PubMed Central journal article supplement (PMC5240012)
Supplement: Supp_Fig8.pdf [file Supp_Fig8.pdf]

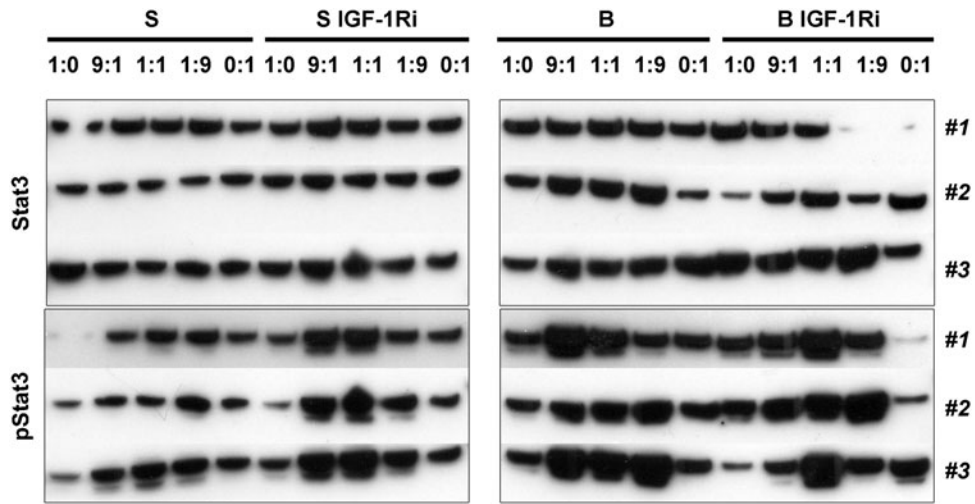

**SUPPLEMENTARY FIG. S8.** Western blots relative to the IL-6/Stat3 signaling cascade for the five different ES:MSC ratios examined (1:0, 9:1, 1:1, 1:9, and 0:1) cultured in static (S) or flow perfusion conditions (B), and untreated or treated with IGF-1R inhibitor (IGF-1Ri). Three biological replicates (#1, #2, and #3) are presented per each protein analyzed.
