# Supplementary material
Source: PubMed Central journal article supplement (PMC5240012)
Supplement: Supp_Fig9.pdf [file Supp_Fig9.pdf]

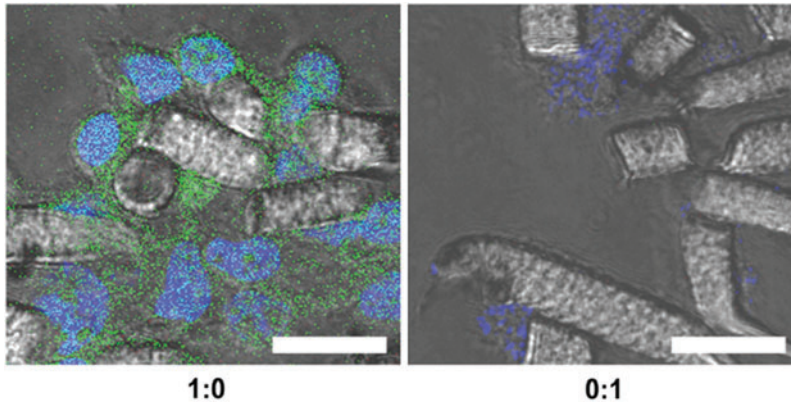

**SUPPLEMENTARY FIG. S9.** Representative staining for ES:MSC coculture groups 1:0 and 0:1 under flow perfusion conditions. Cells were stained for nuclei (*blue*) and for pStat3 expression (*red*). ES cells were also transfected with the GFP reporter (*green*), and scale bar represents 15  $\mu\text{m}$  in all images. GFP, green fluorescent protein.
